# Supplementary material for: Changes in Soil Phosphorus Availability and Microbial Community Structures in Rhizospheres of Oilseed Rapes Induced by Intercropping with White Lupins
Source: MDPI journal article supplement (doi:10.3390/microorganisms11020326), 2023-01-28
Supplement: s1 [file s1]

**Table S1.** The metabolites Lon (M/Z) and positive/negative ionization mode of differential root exudates in rhizospheres of oilseed rapes between RR and RL systems.

| Metabolite                                             | Lon (M/Z) | Positive/negative |
|--------------------------------------------------------|-----------|-------------------|
| Organic acids and derivatives                          |           |                   |
| N-Undecanoylglycine                                    | 226.18    | ESI+              |
| Citric acid                                            | 215.02    | ESI+              |
| Creatine                                               | 132.08    | ESI+              |
| ADMA                                                   | 203.15    | ESI+              |
| Tryptophyl-cysteine                                    | 325.13    | ESI+              |
| Isoleucylproline                                       | 211.14    | ESI+              |
| 2-Amino-4-[(2-hydroxy-1-oxopropyl)amino] butanoic acid | 155.08    | ESI+              |
| L-trans-5-Hydroxy-2-piperidinecarboxylic acid          | 128.07    | ESI+              |
| Lysyl-valine                                           | 532.38    | ESI+              |
| Leucyl-threonine                                       | 215.14    | ESI+              |
| Organic oxygen compounds                               |           |                   |
| 5-Hydroxy-6-methoxyindole glucuronide                  | 340.11    | ESI+              |
| Aminoacetone                                           | 74.06     | ESI+              |
| Organic nitrogen compounds                             |           |                   |
| L-Carnitine                                            | 162.11    | ESI+              |
| Memantine                                              | 180.17    | ESI+              |
| Tromethamine                                           | 122.08    | ESI+              |
| Organoheterocyclic compounds                           |           |                   |
| Cis-quincoxepane                                       | 198.19    | ESI+              |
| 9-Azabicyclo[3.3.1] nonan-3-one                        | 157.13    | ESI+              |
| 5-Oxo-2(5H)-isoxazolepropanenitrile                    | 177.01    | ESI+              |
| Phenylpropanoids and polyketides                       |           |                   |
| 2-Pentyl-3-phenyl-2-propenal                           | 443.23    | ESI+              |
| Nucleosides, nucleotides, and analogs                  |           |                   |
| Lamivudine sulfoxide                                   | 266.02    | ESI-              |
| 7-Methylinosine                                        | 266.10    | ESI+              |
| Lipids and lipid-like molecules                        |           |                   |
| Aucubin                                                | 311.16    | ESI+              |
| Etonogestrel                                           | 388.22    | ESI+              |
| 4,5-Dihydrovomifoliol                                  | 209.15    | ESI+              |
| (2S,4R)-p-Mentha-1(7),8-dien-2-ol                      | 327.23    | ESI+              |
| Dihydrozeatin-O-glucoside                              | 348.17    | ESI+              |
| Benzenoids                                             |           |                   |
| Benzaldehyde                                           | 107.05    | ESI+              |
| 4-Hydroxy-5-phenyltetrahydro-1,3-oxazin-2-one          | 176.07    | ESI+              |
| 2-Dodecylbenzenesulfonic acid                          | 325.18    | ESI-              |
| Other                                                  |           |                   |
| NORETHINDRONE ACETATE                                  | 339.20    | ESI-              |
| 3-methyl-2-Quinoxalinone                               | 161.07    | ESI+              |
| 13-Hydroxylupanine                                     | 265.19    | ESI+              |
| Allothreonine                                          | 120.07    | ESI+              |
| Eicosanoyl-EA                                          | 356.35    | ESI+              |
| 5-Hydroxyindol-2-carboxylic acid                       | 178.05    | ESI+              |

|                                                                                            |        |      |
|--------------------------------------------------------------------------------------------|--------|------|
| 3,5-dihydroxy-2-(3-hydroxyphenyl)-8,8-dimethyl-4H,8H-pyrano[2,3-f] chromen-4-one           | 353.10 | ESI+ |
| 3,4,5-trihydroxy-6-[(2-phenylacetyl)oxy] oxane-2-carboxylic acid                           | 277.07 | ESI+ |
| 2-Deoxy-2-dimethylamino-alpha-D-Glucose                                                    | 208.12 | ESI+ |
| 2-AI                                                                                       | 134.10 | ESI+ |
| 3-(5,7-dihydroxy-2,2-dimethyl-3,4-dihydro-2H-1-benzopyran-6-yl)-7-hydroxy-4H-chromen-4-one | 319.10 | ESI+ |
| 8-(1,2-dihydroxypropan-2-yl)-9-hydroxy-2H,8H,9H-furo[2,3-h] chromen-2-one                  | 296.11 | ESI+ |
| Phenylenediamine                                                                           | 109.08 | ESI+ |

---
